# Supplementary material for: Intraoperative Cerebral Hemodynamic Monitoring during Carotid Endarterectomy via Diffuse Correlation Spectroscopy and Near-Infrared Spectroscopy
Source: MDPI journal article supplement (doi:10.3390/brainsci12081025), 2022-08-02
Supplement: s1 [file s1]

## Supplemental Information for

# Intraoperative Cerebral Hemodynamic Monitoring during Carotid Endarterectomy via Diffuse Correlation Spectroscopy and Near-Infrared Spectroscopy

Kutlu Kaya <sup>1,2,\*</sup>, Alexander I. Zavriyev <sup>1</sup>, Felipe Orihuela-Espina <sup>1,3</sup>, Mirela V. Simon <sup>4</sup>, Glenn M. LaMuraglia <sup>5</sup>, Eric T. Pierce <sup>6</sup>, Maria Angela Franceschini <sup>1</sup> and John Sunwoo <sup>1,\*</sup>

<sup>1</sup> Optics at Athinoula A. Martinos Center for Biomedical Imaging, Department of Radiology, Massachusetts General Hospital, Harvard Medical School, Boston, MA 02114, USA; zav.shurik@gmail.com (A.I.Z.); mfranceschini@mgh.harvard.edu (M.A.F.)

<sup>2</sup> Department of Physiology, Faculty of Medicine, Hacettepe University, 06230 Ankara, Turkey

<sup>3</sup> School of Computer Science, University of Birmingham, Birmingham B15 2TT, UK; f.oriuela-espina@bham.ac.uk

<sup>4</sup> Department of Neurology, Massachusetts General Hospital, Harvard Medical School, Boston, MA 02114, USA; mvsimon@mgh.harvard.edu

<sup>5</sup> Division of Vascular and Endovascular Surgery in the General Surgical Services, Massachusetts General Hospital, Harvard Medical School, Boston, MA 02114, USA; glamuraglia@mgh.harvard.edu

<sup>6</sup> Department of Anesthesia, Critical Care and Pain Medicine, Massachusetts General Hospital, Harvard Medical School, Boston, MA 02114, USA; etpierce@mgh.harvard.edu

\* Correspondence: [kkaya@mgh.harvard.edu](mailto:kkaya@mgh.harvard.edu) (K.K.); [jsunwoo@mgh.harvard.edu](mailto:jsunwoo@mgh.harvard.edu) (J.S.)

**Supplementary Table S1.** Calculated  $\mu_a$ ,  $\mu_s'$ , and DPF values in each wavelength for the right and left forehead probe.

| Forehead Probe | $\lambda$ (nm) | $\mu_a$ (cm <sup>-1</sup> ) | $\mu_s'$ (cm <sup>-1</sup> ) | DPF  |
|----------------|----------------|-----------------------------|------------------------------|------|
| Right          | 672            | 0.26                        | 11.38                        | 5.78 |
|                | 706            | 0.17                        | 10.57                        | 6.77 |
|                | 759            | 0.21                        | 9.48                         | 5.84 |
|                | 830            | 0.19                        | 8.29                         | 5.60 |
| Left           | 690            | 0.20                        | 10.94                        | 6.41 |
|                | 726            | 0.16                        | 10.13                        | 6.87 |
|                | 784            | 0.18                        | 9.03                         | 6.19 |
|                | 813            | 0.18                        | 8.55                         | 6.01 |

$\lambda$ , wavelength;  $\mu_a$ , absorption coefficient;  $\mu_s'$ , reduced scattering coefficient;  $DPF$ , differential pathlength factor.

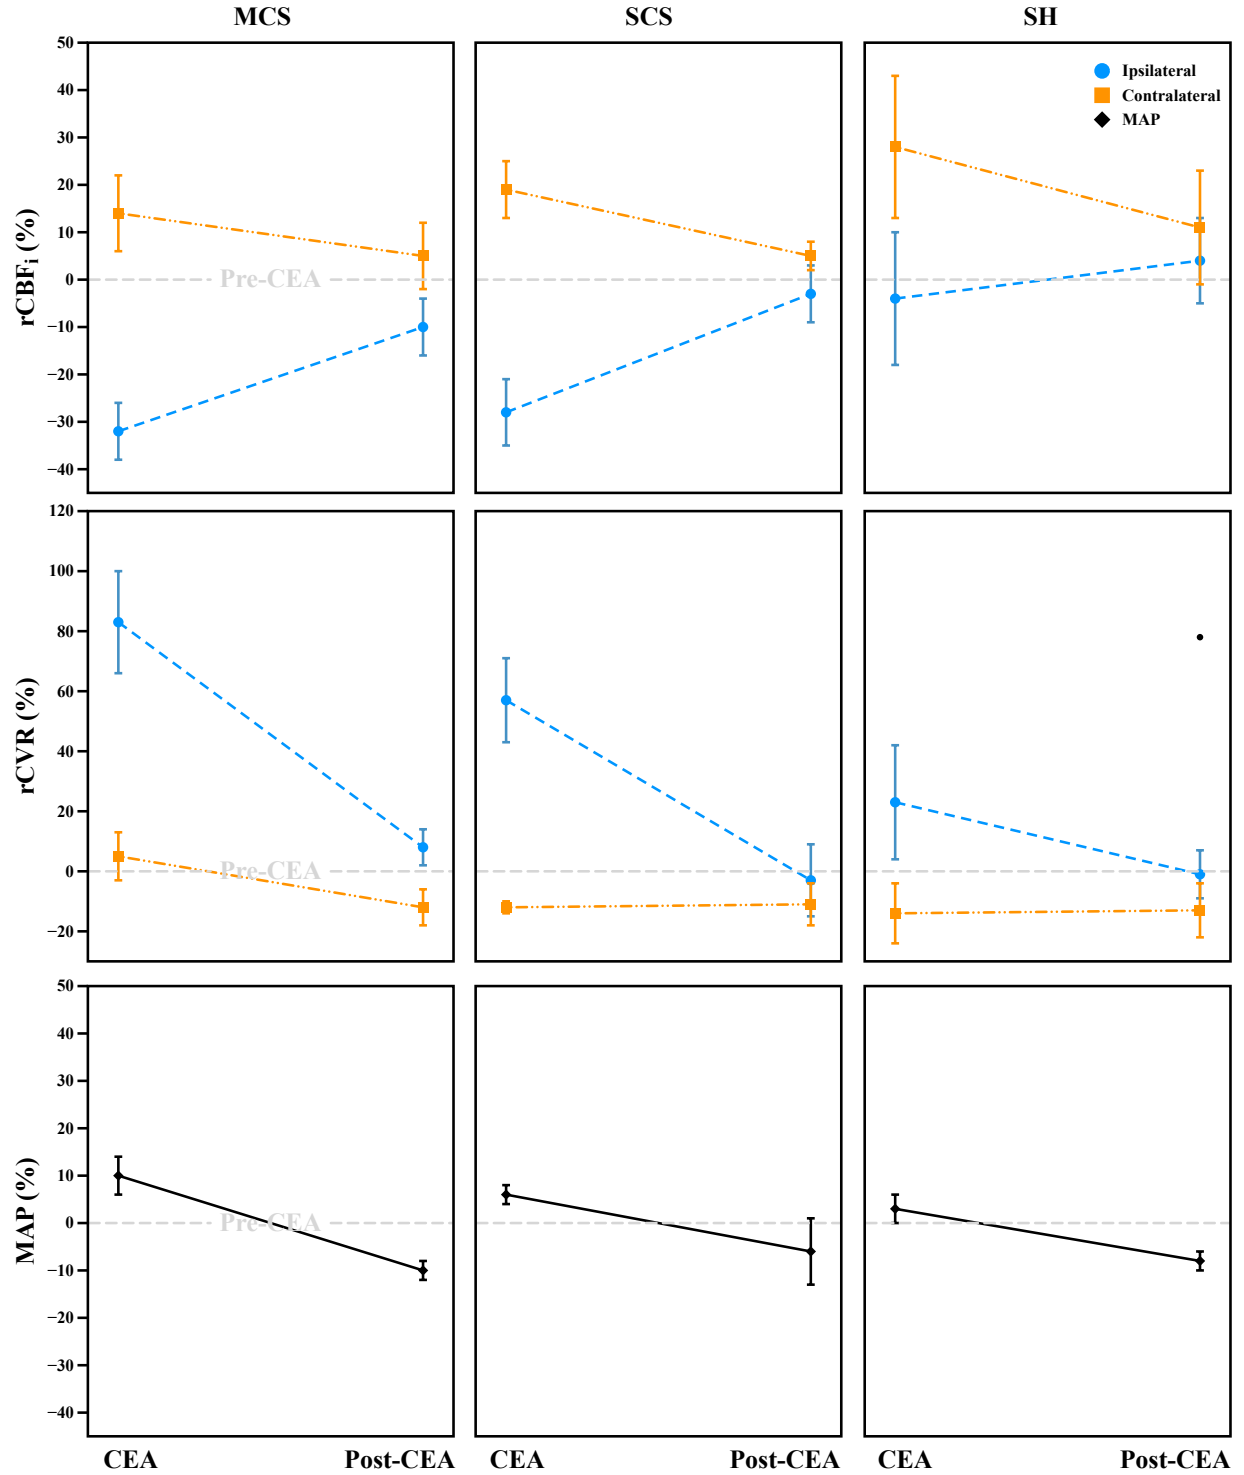

**Supplementary Figure S1.** Hemodynamic changes in rCBFi, rCVR, and MAP in each group during the CEA and post-CEA phases. All changes were normalized with respect to the pre-CEA phase (long baseline, grey dashed line). All data are represented in mean  $\pm$  standard error of the mean. One patient was defined as an outlier in the SH

group, indicated as a black-filled circle. MCS, normal-to-mild contralateral stenosis group; SCS, moderate-to-substantial contralateral stenosis group; SH, shunt utilization group; CEA, carotid endarterectomy;  $rCBF_i$ , relative cerebral blood flow index;  $rCVR$ , relative cerebrovascular resistance; MAP, mean arterial pressure.

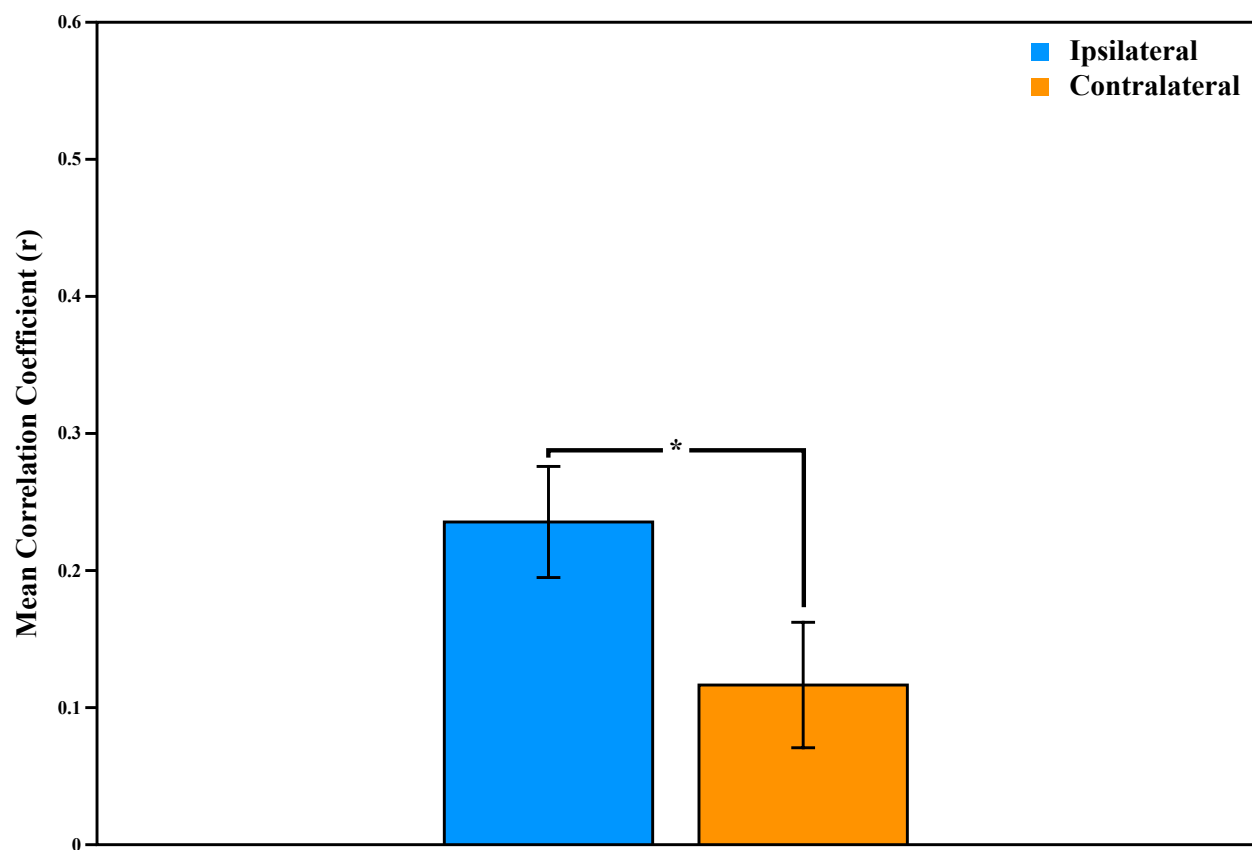

**Supplementary Figure S2.** Mean correlation coefficients ( $r$ ) between hemispheres during the pre-CEA phase. When all patients are considered,  $CBF_i$  was more autoregulated in the contralateral hemisphere than the ipsilateral hemisphere during the pre-CEA phase. \*  $p < 0.05$ .  $CBF_i$ , cerebral blood flow index; MCS, normal-to-mild contralateral stenosis group; SCS, moderate-to-substantial contralateral stenosis group; SH, shunt utilization group.

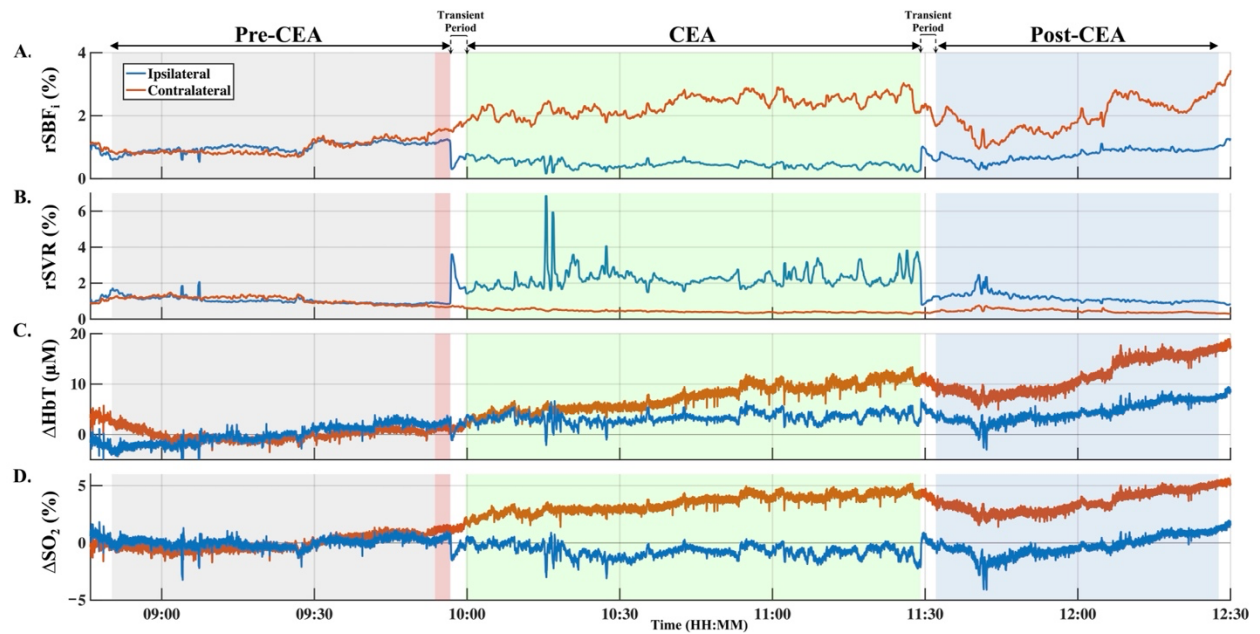

**Supplementary Figure S3.** A typical measurement on a patient (#21, MCS group) at 5 mm during CEA. All data are normalized with respect to the pre-CEA phase (long baseline), represented in grey and red shaded areas. Ipsilateral and contralateral hemodynamic changes at 5 mm are shown in blue and orange, respectively, for  $rSBF_i$  (A),  $rSVR$  (B),  $\Delta HbT$  (C), and  $\Delta SO_2$  (D). All data are normalized with respect to the pre-CEA phase (long baseline), represented in grey and red shaded areas. A three-minute short baseline is represented in the red shaded area. CEA and post-CEA phases are represented in shaded light green and blue areas, respectively. CEA, carotid endarterectomy;  $rSBF_i$ , relative superficial blood flow index;  $rSVR$ , relative superficial vascular resistance;  $\Delta HbT$ , changes in total hemoglobin concentration;  $\Delta SO_2$ , changes in oxygen saturation.
